# Supplementary material for: Growth and Non-Thermal Inactivation of Staphylococcus aureus in Sliced Dry-Cured Ham in Relation to Water Activity, Packaging Type and Storage Temperature
Source: MDPI journal article supplement (doi:10.3390/foods12112199), 2023-05-30
Supplement: s1 [file s1]

**Table S3.** Lactic acid bacteria counts (Log<sub>10</sub> cfu/g) measured in DCH with different a<sub>w</sub> content and type of packaging stored at various storage temperatures.

| Packaging | a <sub>w</sub> | T°C | Time (days) |           |      |           |       |       |      |      |      |      |
|-----------|----------------|-----|-------------|-----------|------|-----------|-------|-------|------|------|------|------|
|           |                |     | 0           | 5         | 12   | 16        | 28    | 40    | 147  | 196  | 231  | 293  |
| Air       | 0.861          | 15  | 0.00±0.00   | 0.00±0.00 | -    | -         | 1.85  | -     | -    | -    | -    | -    |
|           |                | 20  | 0.00±0.00   | 1.65      | 0.00 | -         | 0.00  | -     | -    | -    | -    | -    |
|           |                | 25  | 0.00±0.00   | 0.70      | 0.00 | -         | 0.00  | -     | -    | -    | -    | -    |
|           | 0.901          | 15  | 0.00±0.00   | 0.00      | -    | -         | 4.13  | -     | -    | -    | -    | -    |
|           |                | 20  | 0.00±0.00   | -         | 5.14 | -         | -     | -     | -    | -    | -    | -    |
|           |                | 25  | 0.00±0.00   | -         | 4.39 | -         | 4.03  | -     | -    | -    | -    | -    |
|           | 0.925          | 15  | 3.12±2.57   | -         | 5.26 | -         | >6.00 | -     | -    | -    | -    | -    |
|           |                | 20  | 3.12±2.57   | >6.00     | 7.18 | -         | >6.00 | -     | -    | -    | -    | -    |
|           |                | 25  | 3.12±2.57   | >6.00     | 6.87 | -         | >6.00 | -     | -    | -    | -    | -    |
| Vacuum    | 0.861          | 2   | 0.00±0.00   | -         | 0.00 | 0.00±0.00 | 0.00  | -     | -    | 0.00 | 0.00 | 0.00 |
|           |                | 8   | 0.00±0.00   | -         | 0.00 | 0.00±0.00 | 3.60  | -     | -    | 0.00 | 0.00 | 0.00 |
|           |                | 15  | 0.00±0.00   | -         | 0.00 | 0.00±0.00 | 0.00  | -     | -    | 0.00 | 0.00 | 0.00 |
|           |                | 20  | 0.00±0.00   | -         | 0.00 | 2.07±2.93 | 0.00  | -     | -    | 0.00 | 0.00 | 0.00 |
|           |                | 25  | 0.00±0.00   | -         | 0.00 | 1.89±2.67 | 0.00  | -     | -    | 0.00 | 0.00 | 0.00 |
|           | 0.901          | 2   | 0.00±0.00   | -         | 1.70 | 1.80±2.55 | 0.00  | -     | -    | 0.00 | 0.00 | 0.00 |
|           |                | 8   | 0.00±0.00   | -         | 2.00 | 0.00±0.00 | 0.00  | -     | -    | 0.00 | 4.51 | 0.00 |
|           |                | 15  | 0.00±0.00   | -         | 1.00 | 2.10±2.97 | 4.91  | -     | -    | -    | 4.62 | 5.45 |
|           |                | 20  | 0.00±0.00   | -         | 4.60 | 5.50±0.70 | 6.14  | 5.50  | 5.31 | -    | -    | -    |
|           |                | 25  | 0.00±0.00   | -         | 0.00 | 4.75±0.27 | 3.90  | 6.59  | 0.00 | -    | -    | -    |
|           | 0.925          | 2   | 3.12±2.57   | -         | 3.73 | 4.85±0.35 | 5.60  | -     | -    | 6.52 | 6.58 | 0.00 |
|           |                | 8   | 3.12±2.57   | -         | 4.14 | 4.30±0.00 | 4.20  | -     | -    | 4.34 | 6.70 | 0.00 |
|           |                | 15  | 3.12±2.57   | -         | 5.31 | 6.48±2.10 | 7.84  | -     | -    | -    | 6.11 | 5.52 |
|           |                | 20  | 3.12±2.57   | -         | 5.93 | 5.24±1.28 | 5.38  | 6.76  | 6.08 | -    | -    | -    |
|           |                | 25  | 3.12±2.57   | -         | 7.34 | 6.80±0.94 | 6.76  | 6.67  | -    | -    | -    | -    |
| MAP       | 0.861          | 2   | 0.00±0.00   | -         | 0.00 | -         | 3.30  | -     | -    | 0.00 | 0.00 | 0.00 |
|           |                | 8   | 0.00±0.00   | -         | 0.00 | -         | 0.00  | -     | -    | 0.00 | 0.00 | 0.00 |
|           |                | 15  | 0.00±0.00   | -         | 2.56 | -         | 4.00  | 0.00  | 0.00 | 0.00 | 0.00 | -    |
|           |                | 25  | 0.00±0.00   | -         | 0.00 | -         | 4.85  | -     | 2.30 | -    | -    | -    |
|           | 0.901          | 2   | 0.00±0.00   | -         | 0.00 | -         | 0.00  | -     | -    | 0.00 | 0.00 | 0.00 |
|           |                | 8   | 0.00±0.00   | -         | 1.70 | -         | 4.66  | -     | -    | 0.00 | 0.00 | 6.61 |
|           |                | 15  | 0.00±0.00   | -         | 0.00 | -         | 3.60  | 4.53  | 4.08 | -    | 0.00 | 0.00 |
|           |                | 25  | 0.00±0.00   | -         | 0.00 | -         | 4.56  | 4.00  | 0.00 | -    | -    | 0.00 |
|           | 0.925          | 2   | 3.12±2.57   | -         | 1.85 | -         | 3.30  | -     | -    | 6.69 | 6.72 | 0.00 |
|           |                | 8   | 3.12±2.57   | -         | 4.66 | -         | 4.74  | -     | -    | 6.83 | 6.96 | 6.59 |
|           |                | 15  | 3.12±2.57   | -         | 2.90 | -         | 5.56  | >6.00 | 6.87 | -    | 6.90 | 6.28 |
|           |                | 25  | 3.12±2.57   | 2.52±1.04 | 5.11 | -         | 6.76  | 6.45  | 4.26 | -    | -    | -    |
