# Supplementary material for: Growth and Non-Thermal Inactivation of Staphylococcus aureus in Sliced Dry-Cured Ham in Relation to Water Activity, Packaging Type and Storage Temperature
Source: MDPI journal article supplement (doi:10.3390/foods12112199), 2023-05-30
Supplement: s1 [file s1]

**Table S4.** Developed predictive models of *S. aureus* inactivation in dry-cured ham in terms of log reduction,  $\text{Log}_{10}(N/N_0)$ , as a function of storage temperature (T, in °C) and time (t, in days) for each type of packaging system, i.e., air, vacuum and modified atmosphere.

| Packaging type | Predictive model <sup>a</sup>                                                                             |
|----------------|-----------------------------------------------------------------------------------------------------------|
| Air            | $\text{Log}_{10} (N/N_0) = -((t/10^{\text{Log}_{10}(-1.848 + 0.263 \cdot T - 0.006 \cdot T^2)})^{0.495})$ |
| Vacuum         | $\text{Log}_{10} (N/N_0) = -((t/10^{\text{Log}_{10}(2.597-0.09 \cdot T+0.002 \cdot T^2)})^{0.768})$       |
| MAP            | $\text{Log}_{10} (N/N_0) = -((t/10^{\text{Log}_{10}(3.088-0.133 \cdot T+0.003 \cdot T^2)})^{0.838})$      |

<sup>a</sup>: for dry-cured ham (pH 5.80 ± 0.06) showing three different aw: low, medium and high, selected to cover the range of aw variability usually found (ca. 0.860 to 0.925)
