# Supplementary material for: Growth and Non-Thermal Inactivation of Staphylococcus aureus in Sliced Dry-Cured Ham in Relation to Water Activity, Packaging Type and Storage Temperature
Source: MDPI journal article supplement (doi:10.3390/foods12112199), 2023-05-30
Supplement: s1 [file s1]

**Table S2.** pH values of DCH with different  $a_w$  content and type of packaging stored at various storage temperatures.

| Packaging | $a_w$ | T°C | Time (days) |           |           |           |       |      |           |      |           |           |
|-----------|-------|-----|-------------|-----------|-----------|-----------|-------|------|-----------|------|-----------|-----------|
|           |       |     | 0           | 5         | 12        | 16        | 28    | 40   | 147       | 196  | 231       | 293       |
| Air       | 0.861 | 15  | 5.69±0.00   | 5.74±0.01 | -         | -         | 5.73  | -    | -         | -    | -         | -         |
|           |       | 20  | 5.69±0.00   | 5.69±0.02 | 5.71      | -         | 5.62  | -    | -         | -    | -         | -         |
|           |       | 25  | 5.69±0.00   | 5.69±0.01 | 5.79      | -         | 5.67  | -    | -         | -    | -         | -         |
|           | 0.901 | 15  | 5.71±0.00   | 5.65±0.04 | -         | -         | 5.69  | -    | -         | -    | -         | -         |
|           |       | 20  | 5.71±0.00   | -         | 5.68      | -         | -     | -    | -         | -    | -         | -         |
|           |       | 25  | 5.71±0.00   | -         | 5.54      | -         | 5.60  | -    | -         | -    | -         | -         |
|           | 0.925 | 15  | 5.78±0.00   | -         | 5.79      | -         | 5.73  | -    | -         | -    | -         | -         |
|           |       | 20  | 5.78±0.00   | 5.89±0.03 | 5.81      | -         | 5.71  | -    | -         | -    | -         | -         |
|           |       | 25  | 5.78±0.00   | 5.82±0.01 | 5.69      | -         | 5.74  | -    | -         | -    | -         | -         |
| Vacuum    | 0.861 | 2   | 5.69±0.00   | -         | 5.75±0.01 | 5.63±0.02 | 5.65  | -    | -         | 5.88 | 5.70      | 5.75±0.00 |
|           |       | 8   | 5.69±0.00   | -         | 5.89±0.10 | 5.81±0.03 | 5.78  | -    | -         | 5.81 | 5.85      | 5.93±0.00 |
|           |       | 15  | 5.69±0.00   | -         | 5.82±0.02 | 5.78±0.01 | 5.73  | -    | -         | 5.61 | 5.66      | 5.76±0.00 |
|           |       | 20  | 5.69±0.00   | -         | 5.75±0.01 | 5.68±0.01 | 5.55  | -    | -         | -    | -         | -         |
|           |       | 25  | 5.69±0.00   | -         | 5.62±0.00 | 5.43±0.04 | 5.48  | -    | -         | -    | -         | -         |
|           | 0.901 | 2   | 5.71±0.00   | -         | 5.82±0.06 | 5.77±0.00 | 5.68  | -    | -         | 5.73 | 5.77      | 5.85±0.00 |
|           |       | 8   | 5.71±0.00   | -         | 5.92±0.04 | 5.79±0.02 | 5.76  | -    | -         | 5.82 | 5.78      | 5.84±0.00 |
|           |       | 15  | 5.71±0.00   | -         | 5.76±0.05 | 5.74±0.01 | 5.71  | -    | -         | -    | 5.66      | 5.88±0.00 |
|           |       | 20  | 5.71±0.00   | -         | 5.66±0.04 | 5.59±0.04 | 5.46  | 5.48 | 5.64±0.14 | -    | -         | -         |
|           |       | 25  | 5.71±0.00   | -         | 5.59±0.00 | 5.44±0.04 | 5.57  | 5.55 | 5.88      | -    | -         | -         |
|           | 0.925 | 2   | 5.78±0.00   | -         | 5.90±0.07 | 5.86±0.06 | 5.84  | -    | -         | 5.94 | 5.91      | 5.84±0.00 |
|           |       | 8   | 5.78±0.00   | -         | 5.80±0.03 | 5.84±0.01 | 5.75  | -    | -         | 5.70 | 5.91      | 5.74±0.00 |
|           |       | 15  | 5.78±0.00   | -         | 5.76±0.05 | 5.97±0.01 | 5.70  | -    | -         | -    | 6.05      | 5.91±0.00 |
|           |       | 20  | 5.78±0.00   | -         | 5.70±0.02 | 5.55±0.05 | 5.51  | 5.63 | 5.95      | -    | -         | -         |
|           |       | 25  | 5.78±0.00   | -         | 5.64±0.06 | 5.58±0.00 | 5.568 | 5.71 | -         | -    | -         | -         |
| MAP       | 0.861 | 2   | 5.69±0.00   | -         | 5.89±0.02 | -         | 5.71  | -    | -         | 5.65 | 5.81      | 5.62±0.00 |
|           |       | 8   | 5.69±0.00   | -         | 5.88±0.03 | -         | 5.61  | -    | -         | 5.66 | 5.68      | 5.75±0.00 |
|           |       | 15  | 5.69±0.00   | -         | 5.66±0.01 | -         | 5.59  | 5.63 | 5.22      | 5.37 | 5.34±0.00 | -         |
|           |       | 25  | 5.69±0.00   | -         | 5.59±0.01 | -         | 5.32  | -    | 5.34      | -    | -         | -         |
|           | 0.901 | 2   | 5.71±0.00   | -         | 5.93±0.02 | -         | 5.66  | -    | -         | 5.75 | 5.78      | 5.70±0.00 |
|           |       | 8   | 5.71±0.00   | -         | 5.94±0.02 | -         | 5.63  | -    | -         | 5.66 | 5.67      | 5.64±0.00 |
|           |       | 15  | 5.71±0.00   | -         | 5.75±0.01 | -         | 5.62  | 5.55 | 5.31      | -    | 5.35      | 5.36±0.00 |
|           |       | 25  | 5.71±0.00   | -         | 5.65±0.00 | -         | 5.32  | 5.26 | 5.19      | -    | -         | 5.41±0.00 |
|           | 0.925 | 2   | 5.78±0.00   | -         | 5.77±0.01 | -         | 5.75  | -    | -         | 5.83 | 5.65      | 5.78±0.00 |
|           |       | 8   | 5.78±0.00   | -         | 5.76±0.06 | -         | 5.73  | -    | -         | 5.53 | 5.47      | 5.54±0.00 |
|           |       | 15  | 5.78±0.00   | -         | 5.81±0.01 | -         | 5.61  | 5.39 | 5.64      | -    | 5.7       | 5.92±0.00 |
|           |       | 25  | 5.78±0.00   | 5.68±0.12 | 5.49±0.00 | -         | 5.43  | 5.48 | 5.87      | -    | -         | -         |
