# Supplementary material for: Growth and Non-Thermal Inactivation of Staphylococcus aureus in Sliced Dry-Cured Ham in Relation to Water Activity, Packaging Type and Storage Temperature
Source: MDPI journal article supplement (doi:10.3390/foods12112199), 2023-05-30
Supplement: s1 [file s1]

**Table S1.** Main features of predictive models for growth/no growth (G/NG) boundaries of *S. aureus* used in Study 1.

| Reference               | Modelling approach adopted        | Independent variables<br>[range of applicability] |                                      | Food matrix of application                                                       |
|-------------------------|-----------------------------------|---------------------------------------------------|--------------------------------------|----------------------------------------------------------------------------------|
|                         |                                   | Intrinsic                                         | Extrinsic                            |                                                                                  |
| Borneman et al.<br>[25] | Logistic regression<br>polynomial | pH [4.0 – 7.0]<br>a <sub>w</sub> [0.68-0.98]      | Temperature [21°C]<br>Time [28 days] | Vacuum-packaged meat products (dry and semi-dry fermented sausages, jerky, etc.) |
| Polese et al.[14]       | Gamma model <sup>a</sup>          | pH [4.0 to 7.0]<br>a <sub>w</sub> [0.88 to 0.99]  | Temperature [0-30 °C]                | Various                                                                          |
| Sym'Previus portal [26] | Gamma model                       | -                                                 | -                                    | -                                                                                |

<sup>a</sup>: preservatives such as organic acids are also included in the model structure, but they are not used in the present study.
