# Supplementary material for: Growth and Non-Thermal Inactivation of Staphylococcus aureus in Sliced Dry-Cured Ham in Relation to Water Activity, Packaging Type and Storage Temperature
Source: MDPI journal article supplement (doi:10.3390/foods12112199), 2023-05-30
Supplement: s1 [file s1]

**Table S5.** Comparison of Log<sub>10</sub> reduction observed in published articles dealing with *S. aureus* behaviour in sliced DCH and that predicted by the predictive models developed in the present work. Agreement was considered if the difference between the observed and predicted values were within  $\pm 0.5$  Log<sub>10</sub>.

| Reference                 | Packaging/model used                              | a <sub>w</sub> | T (°C) | pH        | Agreement between the observed and predicted Log <sub>10</sub> reduction (%) |
|---------------------------|---------------------------------------------------|----------------|--------|-----------|------------------------------------------------------------------------------|
| Untermann and Müller [18] | Air                                               | 0.890          | 20     | 5.6       | 86% (6/7)                                                                    |
| Iacumin et al. [35]       | Vacuum                                            | 0.910          | 4      | 5.79      | 83% (5/6)                                                                    |
|                           |                                                   |                | 10     |           | 67% (4/6)                                                                    |
|                           |                                                   |                | 15     |           | 83% (5/6)                                                                    |
|                           |                                                   |                | 25     |           | 67% (4/6)                                                                    |
| Christian et al. [16]     | MAP<br>(70:30 % N <sub>2</sub> :CO <sub>2</sub> ) | 0.888          | 15     | 5.64-5.81 | 80% (8/10)                                                                   |
|                           |                                                   | 0.890          |        |           | 90% (9/10)                                                                   |
|                           |                                                   | 0.905          |        |           | 78% (7/9)                                                                    |
|                           |                                                   | 0.921          |        |           | 78% (7/9)                                                                    |
|                           |                                                   | 0.925          |        |           | 91% (10/11)                                                                  |
