# Supplementary figures and images for: Growth and Non-Thermal Inactivation of Staphylococcus aureus in Sliced Dry-Cured Ham in Relation to Water Activity, Packaging Type and Storage Temperature
Source: MDPI journal article supplement (doi:10.3390/foods12112199), 2023-05-30

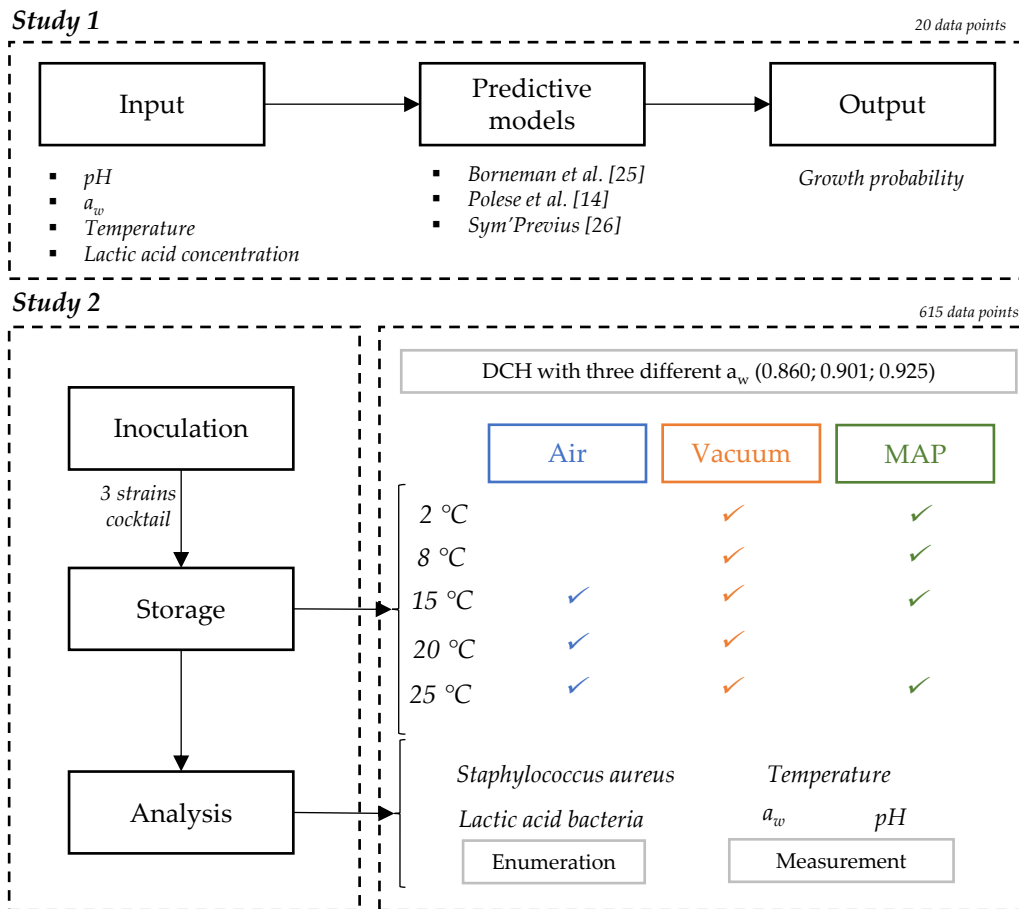

**Figure S1.** Graphical scheme of the experimental design of Study 1 and Study 2.

Supplement: s1 [file s1]
